# Supplementary material for: Accelerated ceria–zirconia solubilization by cationic diffusion inversion at low oxygen activity
Source: Royal Society of Chemistry journal article supplement (doi:10.1039/c6ta06308j), 2016-01-01
Supplement: c6ta06308j1.pdf [file c6ta06308j1.pdf]

## Electronic Supporting Information

### Accelerated ceria-zirconia solubilization by cationic diffusion inversion under low oxygen activity

Vincenzo Esposito,<sup>a†</sup> De Wei Ni,<sup>a</sup> Debora Marani,<sup>a</sup> Francesca Teocoli,<sup>a</sup> Karl Tor Sune Thydén,<sup>a</sup> Daniel Zanetti De Florio,<sup>b</sup> and Fabio Coral Fonseca<sup>c</sup>

<sup>a</sup>Technical University of Denmark, DTU Energy, Risø Campus, Frederiksborgvej 399, DK-4000 Roskilde, Denmark

<sup>b</sup>Universidade Federal do ABC, Santo André, SP 09210-170, Brazil

<sup>c</sup>Nuclear and Energy Research Institute (IPEN-CNEN/SP), 05508-000, São Paulo, SP, Brazil

## Experimental

### Controlled thermal-chemical treatment-reoxidation route

Composite samples were treated as schematically illustrated in Fig. S1. The thermochemical treatments consist in a sequence of steps including:

- In flowing 9 % H<sub>2</sub>-N<sub>2</sub>, heating, at constant rate of 1 °C min<sup>-1</sup>, from 400 to 1400 °C (i.e. sintering temperature, T<sub>sint</sub>), a holding time of 1 hour and cooling to 900 °C at constant rate of 1 °C min<sup>-1</sup>. This was followed by a change in the inlet gas composition from 9% H<sub>2</sub>-N<sub>2</sub> to pure N<sub>2</sub>.
- In N<sub>2</sub>, treated at constant temperature of 900 °C for 5 hours and then changing gas composition to air.
- In air, hold for 5 hours at 900 °C followed by cooling to room temperature at constant cooling rate (1 °C min<sup>-1</sup>).

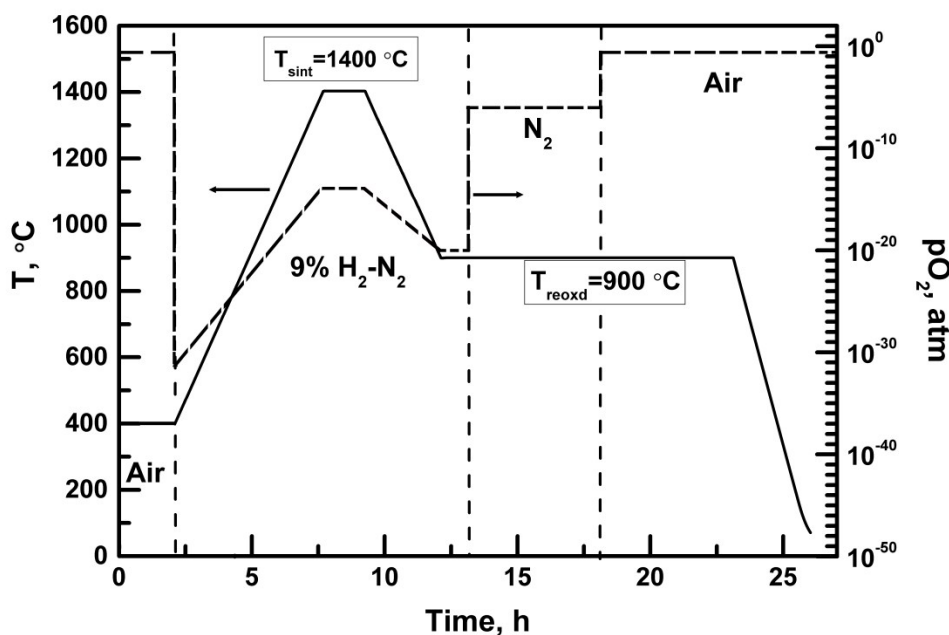

Fig. S1 Re-oxidation profile for dilatometry experiments. Sintering was performed at T<sub>sint</sub> = 1400 °C in reducing atmosphere (9% H<sub>2</sub>-N<sub>2</sub>), then the temperature was reduced to T<sub>reoxd</sub> = 900 °C for reoxidation and cooling in air.

Fig. S1 also shows the expected  $pO_2$  profile expected at the different steps of the heat treatment as a result of the gas mixture and the temperature profile. Particularly, in 9 %  $H_2$ - $N_2$ ,  $pO_2$  ranged from *ca.*  $10^{-32}$  atm (at 400 °C) to  $10^{-14}$  atm at 1400 °C to *ca.*  $10^{-20}$  atm at 900 °C (see also Fig. S2). In  $N_2$  and in air, the expected  $pO_2$  is constant at *ca.*  $10^{-6}$  atm and 0.21 atm, respectively. As also described in our previous work, this methodology allows oxidizing the materials, avoiding mechanical shocks, usually associated to the chemical expansion-contraction process in the elastic regime at low temperatures that can result in crack formation and mechanical failure of specimens.<sup>1</sup>

## Results and discussion

### CGO vacancy concentration

Fig. S2 shows the expected oxygen defect concentration in CGO as function of temperature. This was calculated according to thermodynamical values reported by Wang *et al.* and recalculated for the reactive mixture 9 vol. %  $H_2$  in inert  $N_2$ .<sup>1-5</sup> The plot also shows the calculated  $pO_2$  as a function of the thermal treatment changing as a result of the hydrogen mixtures oxidation. The plot shows increasing concentration of the c-type phase  $Ce_2O_3$  in solid solution for temperatures above 1000 °C. Calculations for pure  $CeO_2$  decomposition into c-type phase are reported in 1, while details on calculations and experimental results on CGO and YSZ are also reported in previous works.<sup>2-4</sup>

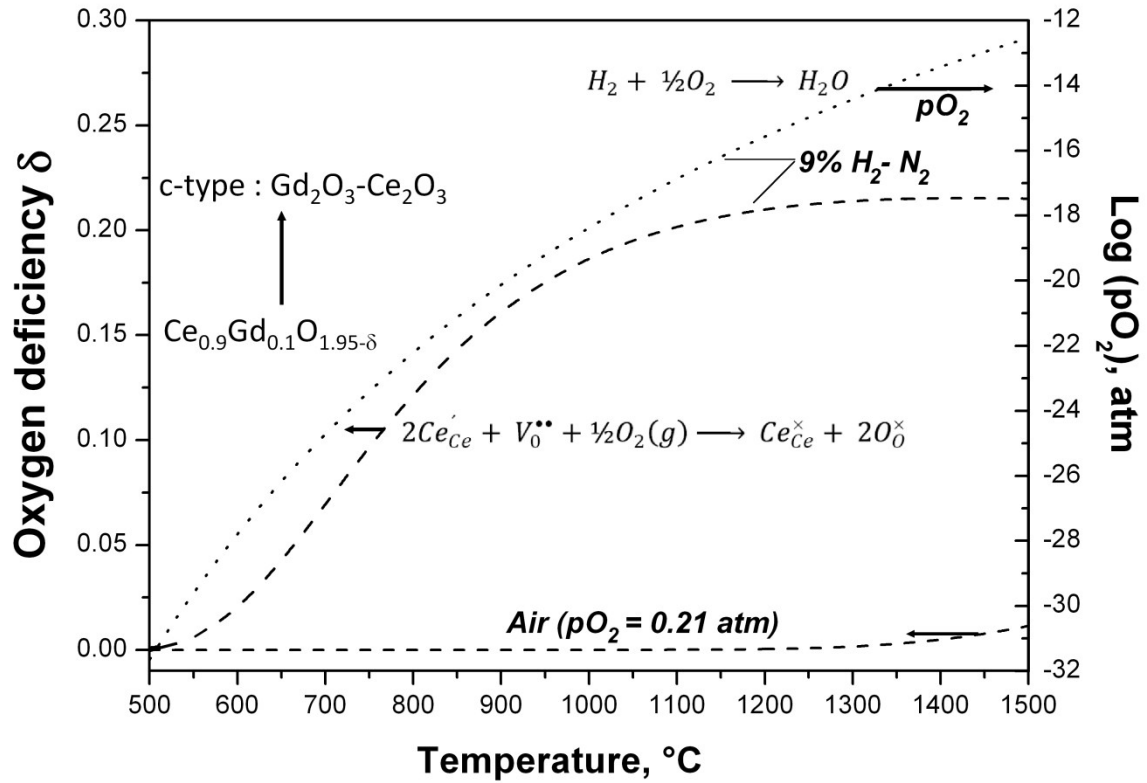

Fig. S2- Oxygen deficiency  $\delta$  in  $Ce_{0.9}Gd_{0.1}O_{1.95-\delta}$  as a function of temperature, calculated as in refs. 1 and 2 (equilibrium conditions) in air and 9%  $H_2$ - $N_2$ . Dotted line shows the calculated oxygen partial pressure (Y2 axis) of  $H_2/O_2$  equilibrium at different temperatures for the 9%  $H_2$ - $N_2$  mixture.

### CGO chemical and thermal expansion

Fig. S3 shows the temperature dependence of both chemical and thermal expansion calculated for pure ceria due to the chemical reduction  $Ce^{4+}$  to  $Ce^{3+}$ . The curves are plotted on the basis of thermodynamical values, *i.e.* at the equilibrium state, as result of chemical reduction in 9 vol. %  $H_2$ - $N_2$ .<sup>1,2</sup> The plot emphasizes the change in volume expected in the treatment shown in Fig. S1 and schematized in Fig. 5.

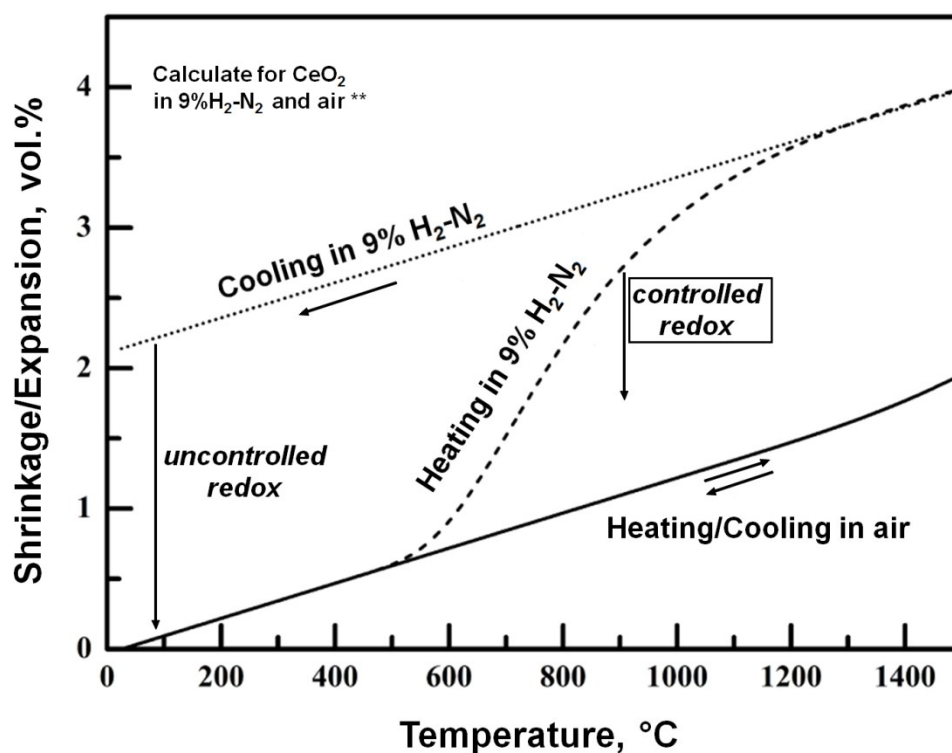

Fig. S3- Calculated shrinkage/expansion due to chemical and thermal treatment for heat-treatment of CGO in 9%  $\text{H}_2\text{-N}_2$  and in air as a function of temperature.

## References

1. D.W. Ni, J. Glasscock, A. Pons, W. Zhang, A. Prasad, S. Sanna, N. Pryds, V. Esposito, *J. Electrochem. Soc.* 2014, **161**[11], F3072.
2. V. Esposito, D.W. Ni, Z. He, W. Zhang, A.S. Prasad, J. Glasscock, C. Chatzichristodoulou, S. Ramousse, A. Kaiser, *Acta Mater.* 2013, **61-16**, 6290.
3. S. Wang, H. Inaba, H. Tagawa, M. Dokiya, T. Hashimoto *Solid State Ionics* 1998, **107**, 73.
4. S. Wang, H. Inaba, H. Tagawa, T. Hashimoto, *J. Electrochem. Soc.* 1997, **144**(11), 4076.
5. H. Hayashi, T. Saitou, N. Maruyama, H. Inaba, K. Kawamura, M. Mori, *Solid State Ionics* 2005, **175**, 613.
